# Supplementary material for: Diet induced obesity alters muscle spindle afferent function in adult mice
Source: PLoS One. 2018 May 2;13(5):e0196832. doi: 10.1371/journal.pone.0196832 (PMC5931673; doi:10.1371/journal.pone.0196832)
Supplement: S1 File — All individual values used to prepare figures, table, and reported averages found in this file. (XLSX) [file pone.0196832.s001.xlsx]

## Sheet: BW
Animal#	Condition	Sex	Week1BW	ExpDayBW	NetChange
C1	0	M	20	32.3	12.3
C2	0	M	20.6	30.3	9.7
C3	0	M	20.6	28.8	8.2
C5	0	M	21	31	10
1_4	0	M	19.1	28.5	9.4
1_5	0	M	19.6	30	10.4
3_1	0	M	18	29.4	11.4
3_2	0	M	18.9	27.6	8.7
3_3	0	M	19.5	30.1	10.6
3_5	0	M	19.7	31.7	12
D1	1	M	21.5	39.4	17.9
D4	1	M	20.4	34.3	13.9
2_2	1	M	10.4	39.1	28.7
2_3	1	M	17.5	35.3	17.8
2_4	1	M	20.2	46.3	26.1
4_1	1	M	19.5	40.4	20.9
4_3	1	M	20.8	39.7	18.9
4_4	1	M	19.3	41.5	22.2
DF1	1	M	19	35.7	16.7
DF2	1	M	19.6	34.3	14.7
DF3	1	M	19.4	34.9	15.5
DF5	1	M	20.1	39.3	19.2
A3	0	F	17.1	21	3.9
A4	0	F	17.6	22.6	5
A5	0	F	17.4	21.3	3.9
AA1	0	F	14.2	16.7	2.5
AA2	0	F	18.4	22.6	4.2
AA4	0	F	17.8	22.9	5.1
AA5	0	F	16.7	21.2	4.5
AAA1	0	F	14.1	18.4	4.3
AAA3	0	F	16.8	19.8	3
AAA4	0	F	14	19	5
AAA5	0	F	15.8	20.8	5
B1	1	F	15.6	22	6.4
B2	1	F	15.1	21.9	6.8
B3	1	F	16.9	23.7	6.8
B4	1	F	15.4	22.1	6.7
BB1	1	F	15.7	21.4	5.7
BB4	1	F	17.3	23.9	6.6
BB5	1	F	16.9	29.2	12.3
BBB1	1	F	14.1	20.3	6.2
BBB2	1	F	14.6	20.7	6.1
BBB3	1	F	16	22.4	6.4
BBB5	1	F	15.3	23.7	8.4

## Sheet: Stretches
Animal#	Muscle#	Stretch%	Condition	Sex	BL	DP	IST	FST	DI
1_4	2a	0.075	0	M	8.17	202.52	82	46	120.52
1_4	2a	0.05	0	M	8.97	119.49	54	34.67	65.49
1_4	2a	0.025	0	M	9.93	90.28	30	22.67	60.28
1_5	1a	0.025	0	M	10.33	51.84	28	21.33	23.84
1_5	1a	0.075	0	M	10.4	89.04	50.67	36	38.37
1_5	1a	0.05	0	M	11.1	70.7	40.67	30.67	30.03
3_1	1a	0.025	0	M	7.6	50.86	27.33	21.33	23.53
3_1	1a	0.05	0	M	10.97	80.05	44.66	33.33	35.39
3_1	1a	0.075	0	M	11.87	101.79	68	53.33	33.79
3_2	2a	0.025	0	M	9.8	66.28	26	22.67	40.28
3_2	2a	0.05	0	M	14.97	71.27	40	34	31.27
3_2	2a	0.075	0	M	17.3	78.54	54	48	24.54
3_3	1a	0.05	0	M	17.03	44.25	30	25.33	14.25
3_3	1a	0.075	0	M	17.13	62.64	37.33	30	25.31
3_3	1a	0.025	0	M	17.33	33.8	23.33	21.33	10.47
3_3	2a	0.025	0	M	8.8	87.48	46	34	41.48
3_3	2a	0.05	0	M	9.43	123.57	79.33	59.33	44.24
3_3	2a	0.075	0	M	10	160.57	112	92	48.57
3_5	1a	0.075	0	M	9.47	86.52	44	32.67	77.05
3_5	1a	0.025	0	M	10.33	44.3	22	19.33	33.97
3_5	1a	0.05	0	M	10.37	82.99	36	27.33	72.62
C1	1a	0.075	0	M	10.73	39.01	24	20	15.01
C1	1a	0.05	0	M	11.5	33.61	20	18	13.61
C1	1a	0.025	0	M	11.83	25.16	17.34	14.67	7.82
C2	1a	0.05	0	M	2.67	27.99	18	13.33	9.99
C2	1a	0.025	0	M	3.03	27.24	14.67	14	12.57
C2	1a	0.075	0	M	4.2	27.5	19.33	14.67	8.17
C2	1b	0.075	0	M	6.1	78.79	61.34	36.67	17.45
C2	1b	0.05	0	M	6.33	56.32	45.34	28.67	10.98
C2	1b	0.025	0	M	6.37	30.98	20	15.33	10.98
C2	2b	0.05	0	M	18.37	157.43	80	58	77.43
C2	2b	0.075	0	M	19.77	218.68	88.67	58.67	130.01
C2	2b	0.025	0	M	20.47	100.85	54	43.33	46.85
C3	1a	0.075	0	M	16.37	93.5	56	38	37.5
C3	1a	0.05	0	M	16.83	79.98	46.67	34	33.31
C3	1a	0.025	0	M	17.03	62.09	34	26.67	28.09
C3	2a	0.075	0	M	20.93	42.25	32.66	27.33	9.59
C3	2a	0.025	0	M	21.33	32.29	25.33	24	6.96
C3	2a	0.05	0	M	21.53	37.19	28.67	26	8.52
C3	2d	0.075	0	M	17.93	61.77	46.67	38.67	15.1
C3	2d	0.025	0	M	18.97	37.91	29.33	26	8.58
C3	2d	0.05	0	M	20.87	52.02	37.34	30.67	14.68
C5	1a	0.075	0	M	15.37	62.26	36	26	26.26
C5	1a	0.025	0	M	15.6	49.06	25.33	20	23.73
C5	1a	0.05	0	M	16.43	56.94	31.33	24	25.61
C5	2b	0.025	0	M	0	31.78	14	7.33	17.78
C5	2b	0.05	0	M	0	39.87	18.66	13.33	21.21
C5	2b	0.075	0	M	0	41.89	22.67	18.67	19.22
C5	2d	0.05	0	M	0	46.85	22	16	24.85
C5	2d	0.075	0	M	0	62.22	29.33	22	32.89
2_2	2a	0.075	1	M	16.43	54.63	41.33	34	13.3
2_2	2a	0.05	1	M	17.23	53.23	37.34	30.67	15.89
2_2	2a	0.025	1	M	18.6	51.6	32	27.33	19.6
2_3	1a	0.025	1	M	13.17	25.16	18	16.67	7.16
2_3	1a	0.05	1	M	15.13	36.81	26	22	10.81
2_3	1a	0.075	1	M	17.8	58.14	37.33	30	20.81
2_4	1a	0.075	1	M	4.93	57.94	36.67	30.67	21.27
2_4	1a	0.05	1	M	11.8	44.96	29.33	25.33	15.63
2_4	1a	0.025	1	M	13.3	36.47	24.66	21.33	11.81
2_4	2a	0.025	1	M	14.2	53.61	33.34	26.67	20.27
2_4	2a	0.075	1	M	15	56.33	40.67	32	15.66
2_4	2a	0.05	1	M	15.7	54.51	36.66	29.33	17.85
4_1	1a	0.025	1	M	22.87	44.17	28.67	26.67	16.04
4_1	1a	0.05	1	M	23.7	52.2	36	30	16.2
4_1	1a	0.075	1	M	23.9	64.11	42	36	22.11
4_1	2a	0.05	1	M	12.63	54.68	35.34	28.67	19.34
4_1	2a	0.025	1	M	12.67	42.25	28	24	17.25
4_1	2a	0.075	1	M	15.17	64.91	44.66	35.33	20.25
4_3	1a	0.075	1	M	6.33	94.12	60	44.67	34.12
4_3	1a	0.05	1	M	7.13	76.36	42.67	32.67	33.69
4_3	1a	0.025	1	M	8.83	51.73	28	22	23.73
4_4	1a	0.025	1	M	0	51.75	14.66	11.33	37.19
4_4	1a	0.05	1	M	0	54.51	18	12	36.51
4_4	1a	0.075	1	M	0	56.33	18	12	38.33
D4	1a	0.025	1	M	0	44.04	25.34	18.67	18.7
D4	1a	0.05	1	M	0	63.71	39.34	26.67	24.37
D4	1a	0.075	1	M	0	78.15	47.33	32	30.82
D4	2c	0.05	1	M	0	42.44	26.67	20.67	15.77
D4	2c	0.075	1	M	0	48	32.67	24	15.33
D4	2c	0.025	1	M	4.13	32.27	18.67	16	13.6
DF1	1b	0.025	1	M	0	42.54	15.33	12	27.21
DF1	1b	0.05	1	M	0	46.7	18	13.33	28.7
DF1	1b	0.075	1	M	0	50.43	20	14.67	30.43
DF1	1c	0.025	1	M	0	43.22	22	18	21.22
DF1	1c	0.05	1	M	0	57.01	32.67	23.33	20.34
DF1	1c	0.075	1	M	0	70.51	40	28.67	30.51
DF1	2a	0.025	1	M	0	28.04	14.67	9.33	13.37
DF1	2a	0.05	1	M	0	36.74	18	11.33	18.74
DF1	2a	0.075	1	M	0	46	22	14	24
DF2	1c	0.025	1	M	0	32.34	21.33	17.33	11.01
DF2	1c	0.05	1	M	0	45.49	30	22	15.49
DF2	1c	0.075	1	M	0	53.1	36.67	28	16.43
DF2	2b	0.025	1	M	0	35.17	16.67	13.33	18.5
DF2	2b	0.05	1	M	0	51.64	26	18	25.64
DF2	2b	0.075	1	M	0	56.89	32	21.33	24.89
DF2	2c	0.075	1	M	10.57	34.7	20.67	18	14.03
DF2	2c	0.05	1	M	10.87	26.98	20	15.33	6.98
DF2	2c	0.025	1	M	11.3	23.24	18	15.33	5.24
DF3	1a	0.025	1	M	0	32.96	22	16.67	10.96
DF3	1a	0.05	1	M	0	60.34	38	26.67	22.34
DF3	1a	0.075	1	M	0	73.04	51.33	37.33	21.71
DF3	2d	0.025	1	M	0	37.77	20	14.67	17.77
DF3	2d	0.05	1	M	0	59.12	32.67	22	26.45
DF3	2d	0.075	1	M	0	70.88	45.33	27.33	25.55
DF5	1a	0.075	1	M	7.7	52.87	32.67	25.33	20.2
DF5	1a	0.05	1	M	9.3	44.89	28	21.33	16.89
DF5	1a	0.025	1	M	10.13	34.31	19.33	17.33	14.98
DF5	1b	0.05	1	M	7.6	44.29	26.67	20.67	17.62
DF5	1b	0.075	1	M	7.6	53.02	34	24	19.02
DF5	1b	0.025	1	M	7.9	37.18	21.33	17.33	15.85
DF5	2a	0.025	1	M	0	60.13	37.33	30	22.8
DF5	2a	0.05	1	M	0	81.81	54	40	27.81
DF5	2a	0.075	1	M	0	96.33	67.33	47.33	29
A3	1b	0.025	0	F	0	27.59	17.33	12	10.26
A3	1b	0.05	0	F	0	40.91	24.67	18	16.24
A3	1b	0.075	0	F	0	47.23	30	22.67	17.23
A4	1c	0.025	0	F	0	50.48	22.67	14.67	27.81
A4	1c	0.05	0	F	0	65.15	34.67	24.67	30.48
A4	1c	0.075	0	F	0	73.49	44	31.33	29.49
A4	1d	0.075	0	F	8.03	161.8	114	95.33	47.8
A4	1d	0.05	0	F	8.83	142.24	93.33	78.67	48.91
A4	1d	0.025	0	F	9.4	107.68	54	40	53.68
A5	1a	0.05	0	F	0	46.92	17.33	8.67	29.59
A5	1a	0.075	0	F	0	52.92	22.67	15.33	30.25
A5	2a	0.025	0	F	0	35.92	19.33	14	16.59
A5	2a	0.05	0	F	0	50.06	24.67	17.33	25.39
A5	2a	0.075	0	F	0	52.7	26	16.67	26.7
AA1	1c	0.075	0	F	7.07	116.97	74	48.67	42.97
AA1	1c	0.05	0	F	7.33	88.81	50	33.33	38.81
AA1	1c	0.025	0	F	7.43	55.03	26.67	20	28.36
AA1	2a	0.025	0	F	0	83.45	43.33	28	40.12
AA1	2a	0.05	0	F	0	114.51	72	49.33	42.51
AA1	2a	0.075	0	F	0	125.83	83.33	56	42.5
AA1	2b	0.025	0	F	0	50.47	19.33	12.67	31.14
AA1	2b	0.05	0	F	0	77.93	30.67	20.67	47.26
AA1	2b	0.075	0	F	0	85.48	37.33	27.33	48.15
AA2	2b	0.025	0	F	0	5.7	4	2	1.7
AA2	2b	0.05	0	F	0	29.69	9.33	6	20.36
AA2	2b	0.075	0	F	0	32.92	12.67	8	20.25
AA4	2a	0.05	0	F	2.37	38.95	22.67	16	16.28
AA4	2a	0.025	0	F	3.97	36.15	18	14.67	18.15
AA4	2a	0.075	0	F	6.9	40.14	24.67	18	15.47
AA4	2c	0.075	0	F	12.9	92.62	45.33	34	47.29
AA4	2c	0.05	0	F	14.53	66.64	38.67	30.67	27.97
AA4	2c	0.025	0	F	15.87	56.08	28.67	24.67	27.41
AA5	1b	0.075	0	F	9.23	70.63	48	35.33	22.63
AA5	1b	0.05	0	F	9.93	60.49	40	29.33	20.49
AA5	1b	0.025	0	F	10.73	42.14	27.33	21.33	14.81
AA5	1c	0.075	0	F	10.77	37.96	20	14.67	17.96
AA5	1c	0.05	0	F	11.5	37.61	18	14.67	19.61
AA5	1c	0.025	0	F	11.57	31.52	14.67	14	16.85
AAA3	1c	0.05	0	F	2.23	82.72	59.33	46	29.11
AAA3	1c	0.025	0	F	2.83	69.78	40.67	34.67	23.39
AAA3	1c	0.075	0	F	5.87	95.9	65.33	56	30.57
AAA3	1d	0.025	0	F	15.13	30.55	20	17.33	10.55
AAA3	1d	0.075	0	F	15.43	39.81	26	22	13.81
AAA3	1d	0.05	0	F	15.47	37.81	24	20.67	13.79
AAA3	2a	0.025	0	F	0	18.37	10	6.67	8.37
AAA3	2a	0.05	0	F	0	22.14	16.67	11.33	5.47
AAA3	2a	0.075	0	F	0	30.36	20	15.33	10.36
AAA4	1b	0.025	0	F	0	57.05	21.33	8	35.72
AAA4	1b	0.05	0	F	0	96.59	37.33	25.33	59.26
AAA4	1b	0.075	0	F	0	92.49	36.67	24.67	55.82
AAA5	1a	0.05	0	F	15.77	127.46	44	31.33	83.46
AAA5	1a	0.025	0	F	16.47	46.65	24	17.33	22.65
AAA5	1a	0.075	0	F	21.4	136.87	56	46	80.87
B1	2c	0.075	1	F	6.73	61.23	44.67	36	16.56
B1	2c	0.05	1	F	7.4	56.38	38.67	32	17.71
B1	2c	0.025	1	F	8.47	55.98	28	23.33	27.98
B2	1c	0.075	1	F	4.57	41.58	28.67	23.33	12.91
B2	1c	0.05	1	F	6.23	32.62	22.67	18.67	9.95
B2	1c	0.025	1	F	7.23	26.16	16.67	15.33	9.49
B2	1e	0.075	1	F	7.87	47.69	32	26	15.69
B2	1e	0.05	1	F	8.2	35.58	24.67	22	10.91
B2	1e	0.025	1	F	8.77	27.6	16.67	16	10.93
B3	1a	0.075	1	F	12.53	58.26	23.33	18	34.93
B3	1a	0.05	1	F	12.9	47.64	20.67	17.33	26.97
B3	1a	0.025	1	F	13.5	36.23	17.33	16	18.9
B3	2a	0.025	1	F	0	73.9	26.67	10.67	47.23
B3	2a	0.05	1	F	0	84.76	42	19.33	42.76
B3	2a	0.075	1	F	0	101.95	53.33	28.67	48.62
B3	2b	0.025	1	F	0	80.74	18.67	3.33	62.07
B3	2b	0.05	1	F	0	95.9	32.67	14.67	63.23
B3	2b	0.075	1	F	0	103.99	44	20	59.99
B4	1a	0.075	1	F	12.93	70.68	44.67	33.33	26.01
B4	1a	0.05	1	F	13.33	54.57	34.67	27.33	19.9
B4	1a	0.025	1	F	13.5	42	26.67	21.33	15.33
B4	2a	0.05	1	F	0	48.92	26.67	16	22.25
B4	2a	0.075	1	F	0	62.88	32.67	21.33	30.21
B4	2a	0.025	1	F	0	36.89	20	8	16.89
BB4	2b	0.05	1	F	0	26.67	15.33	8.67	11.34
BB4	2b	0.075	1	F	0	26.29	16.67	8.67	9.62
BB4	2c	0.05	1	F	4.63	18.77	11.33	8.67	7.44
BB4	2c	0.025	1	F	5	9.05	8.67	7.33	0.38
BB4	2c	0.075	1	F	5.13	19.88	12.67	10	7.21
BB5	2a	0.025	1	F	0	35.65	16	8	19.65
BB5	2a	0.05	1	F	0	40.61	20	12	20.61
BB5	2a	0.075	1	F	0	41.32	19.33	11.33	21.99
BB5	2b	0.075	1	F	4.2	64.27	43.33	32.67	20.94
BB5	2b	0.05	1	F	4.6	54.26	33.33	25.33	20.93
BB5	2b	0.025	1	F	6	41.44	24.67	19.33	16.77
BB5	2c	0.05	1	F	0	44.41	20.67	9.33	23.74
BB5	2c	0.075	1	F	0	52.61	26	15.33	26.61
BBB1	1a	0.05	1	F	0	38.98	22	16	16.98
BBB1	1a	0.075	1	F	0	39.95	24	16	15.95
BBB1	1a	0.025	1	F	1	36.57	18	13.33	18.57
BBB1	1b	0.025	1	F	0	47.18	20.67	14.67	26.51
BBB1	1b	0.05	1	F	0	60.08	35.33	23.33	24.75
BBB1	1b	0.075	1	F	0	76.93	45.33	30	31.6
BBB1	1c	0.05	1	F	10.53	29.98	22	17.33	7.93
BBB1	1c	0.075	1	F	10.6	34.63	25.33	20	9.3
BBB1	1c	0.025	1	F	11.37	23.65	17.33	16	6.32
BBB2	2a	0.075	1	F	8.1	43.72	32	22.67	11.72
BBB2	2a	0.05	1	F	8.17	37.56	26	20	11.56
BBB2	2a	0.025	1	F	8.83	29.43	18.67	16	10.76
BBB2	2d	0.075	1	F	9	41.85	26	18	15.85
BBB2	2d	0.05	1	F	9.2	34.93	22	17.33	12.93
BBB2	2d	0.025	1	F	9.4	27.92	18	14	9.92
BBB3	1c	0.025	1	F	0	49.78	14	10	35.78
BBB3	1c	0.05	1	F	0	65.53	24	17.33	41.53
BBB3	1c	0.075	1	F	0	80.11	32	22.67	48.11

## Sheet: Vibrations
Animal#	Muscle#	Condition	Sex	Amplitude	Frequency	Entrain
1_5	1b	0	M	5	10	0
1_5	1b	0	M	5	25	0
1_5	1b	0	M	5	50	0
1_5	1b	0	M	5	100	0
1_5	1b	0	M	25	10	1
1_5	1b	0	M	25	25	0
1_5	1b	0	M	25	50	0
1_5	1b	0	M	25	100	0
1_5	1b	0	M	50	10	1
1_5	1b	0	M	50	25	0
1_5	1b	0	M	50	50	0
1_5	1b	0	M	50	100	0
1_5	1b	0	M	100	10	1
1_5	1b	0	M	100	25	1
1_5	1b	0	M	100	50	0
1_5	1b	0	M	100	100	0
1_4	1a	0	M	5	10	0
1_4	1a	0	M	5	25	0
1_4	1a	0	M	5	50	0
1_4	1a	0	M	5	100	0
1_4	1a	0	M	25	10	1
1_4	1a	0	M	25	25	1
1_4	1a	0	M	25	50	0
1_4	1a	0	M	25	100	0
1_4	1a	0	M	50	10	1
1_4	1a	0	M	50	25	1
1_4	1a	0	M	50	50	0
1_4	1a	0	M	50	100	0
1_4	1a	0	M	100	10	1
1_4	1a	0	M	100	25	1
1_4	1a	0	M	100	50	1
1_4	1a	0	M	100	100	1
3_5	1a	0	M	5	10	1
3_5	1a	0	M	5	25	0
3_5	1a	0	M	5	50	0
3_5	1a	0	M	5	100	0
3_5	1a	0	M	25	10	1
3_5	1a	0	M	25	25	1
3_5	1a	0	M	25	50	1
3_5	1a	0	M	25	100	0
3_5	1a	0	M	50	10	1
3_5	1a	0	M	50	25	1
3_5	1a	0	M	50	50	0
3_5	1a	0	M	50	100	0
3_5	1a	0	M	100	10	1
3_5	1a	0	M	100	25	1
3_5	1a	0	M	100	50	1
3_5	1a	0	M	100	100	1
3_3	1a	0	M	5	10	0
3_3	1a	0	M	5	25	0
3_3	1a	0	M	5	50	0
3_3	1a	0	M	5	100	0
3_3	1a	0	M	25	10	1
3_3	1a	0	M	25	25	1
3_3	1a	0	M	25	50	0
3_3	1a	0	M	25	100	0
3_3	1a	0	M	50	10	1
3_3	1a	0	M	50	25	1
3_3	1a	0	M	50	50	0
3_3	1a	0	M	50	100	0
3_3	1a	0	M	100	10	1
3_3	1a	0	M	100	25	1
3_3	1a	0	M	100	50	1
3_3	1a	0	M	100	100	1
3_1	1b	0	M	5	10	1
3_1	1b	0	M	5	25	0
3_1	1b	0	M	5	50	0
3_1	1b	0	M	5	100	0
3_1	1b	0	M	25	10	1
3_1	1b	0	M	25	25	0
3_1	1b	0	M	25	50	0
3_1	1b	0	M	25	100	0
3_1	1b	0	M	50	10	1
3_1	1b	0	M	50	25	1
3_1	1b	0	M	50	50	0
3_1	1b	0	M	50	100	0
3_1	1b	0	M	100	10	1
3_1	1b	0	M	100	25	1
3_1	1b	0	M	100	50	1
3_1	1b	0	M	100	100	1
C5	1a	0	M	5	10	1
C5	1a	0	M	5	25	0
C5	1a	0	M	5	50	0
C5	1a	0	M	5	100	0
C5	1a	0	M	25	10	1
C5	1a	0	M	25	25	1
C5	1a	0	M	25	50	0
C5	1a	0	M	25	100	0
C5	1a	0	M	50	10	1
C5	1a	0	M	50	25	1
C5	1a	0	M	50	50	1
C5	1a	0	M	50	100	0
C5	1a	0	M	100	10	1
C5	1a	0	M	100	25	1
C5	1a	0	M	100	50	1
C5	1a	0	M	100	100	0
C5	1c	0	M	5	10	0
C5	1c	0	M	5	25	1
C5	1c	0	M	5	50	1
C5	1c	0	M	5	100	0
C5	1c	0	M	25	10	1
C5	1c	0	M	25	25	1
C5	1c	0	M	25	50	1
C5	1c	0	M	25	100	1
C5	1c	0	M	50	10	1
C5	1c	0	M	50	25	1
C5	1c	0	M	50	50	1
C5	1c	0	M	50	100	1
C5	1c	0	M	100	10	1
C5	1c	0	M	100	25	1
C5	1c	0	M	100	50	1
C5	1c	0	M	100	100	1
C5	2b	0	M	5	10	0
C5	2b	0	M	5	25	0
C5	2b	0	M	5	50	0
C5	2b	0	M	5	100	0
C5	2b	0	M	25	10	1
C5	2b	0	M	25	25	0
C5	2b	0	M	25	50	0
C5	2b	0	M	25	100	0
C5	2b	0	M	50	10	1
C5	2b	0	M	50	25	1
C5	2b	0	M	50	50	1
C5	2b	0	M	50	100	0
C5	2b	0	M	100	10	1
C5	2b	0	M	100	25	1
C5	2b	0	M	100	50	1
C5	2b	0	M	100	100	1
C5	2d	0	M	5	10	0
C5	2d	0	M	5	25	0
C5	2d	0	M	5	50	0
C5	2d	0	M	5	100	0
C5	2d	0	M	25	10	0
C5	2d	0	M	25	25	0
C5	2d	0	M	25	50	0
C5	2d	0	M	25	100	0
C5	2d	0	M	50	10	1
C5	2d	0	M	50	25	0
C5	2d	0	M	50	50	0
C5	2d	0	M	50	100	0
C5	2d	0	M	100	10	1
C5	2d	0	M	100	25	0
C5	2d	0	M	100	50	0
C5	2d	0	M	100	100	0
C2	1a	0	M	5	10	1
C2	1a	0	M	5	25	0
C2	1a	0	M	5	50	0
C2	1a	0	M	5	100	0
C2	1a	0	M	25	10	1
C2	1a	0	M	25	25	1
C2	1a	0	M	25	50	0
C2	1a	0	M	25	100	0
C2	1a	0	M	50	10	1
C2	1a	0	M	50	25	1
C2	1a	0	M	50	50	1
C2	1a	0	M	50	100	0
C2	1a	0	M	100	10	1
C2	1a	0	M	100	25	1
C2	1a	0	M	100	50	1
C2	1a	0	M	100	100	1
C2	1b	0	M	5	10	0
C2	1b	0	M	5	25	0
C2	1b	0	M	5	50	0
C2	1b	0	M	5	100	0
C2	1b	0	M	25	10	1
C2	1b	0	M	25	25	0
C2	1b	0	M	25	50	0
C2	1b	0	M	25	100	0
C2	1b	0	M	50	10	1
C2	1b	0	M	50	25	1
C2	1b	0	M	50	50	0
C2	1b	0	M	50	100	0
C2	1b	0	M	100	10	1
C2	1b	0	M	100	25	0
C2	1b	0	M	100	50	0
C2	1b	0	M	100	100	0
C2	2b	0	M	5	10	1
C2	2b	0	M	5	25	0
C2	2b	0	M	5	50	0
C2	2b	0	M	5	100	0
C2	2b	0	M	25	10	0
C2	2b	0	M	25	25	1
C2	2b	0	M	25	50	0
C2	2b	0	M	25	100	0
C2	2b	0	M	50	10	1
C2	2b	0	M	50	25	1
C2	2b	0	M	50	50	1
C2	2b	0	M	50	100	1
C2	2b	0	M	100	10	1
C2	2b	0	M	100	25	1
C2	2b	0	M	100	50	1
C2	2b	0	M	100	100	1
C3	2a	0	M	5	10	1
C3	2a	0	M	5	25	0
C3	2a	0	M	5	50	0
C3	2a	0	M	5	100	0
C3	2a	0	M	25	10	1
C3	2a	0	M	25	25	1
C3	2a	0	M	25	50	0
C3	2a	0	M	25	100	0
C3	2a	0	M	50	10	1
C3	2a	0	M	50	25	1
C3	2a	0	M	50	50	0
C3	2a	0	M	50	100	0
C3	2a	0	M	100	10	1
C3	2a	0	M	100	25	1
C3	2a	0	M	100	50	1
C3	2a	0	M	100	100	0
2_4	1a	1	M	5	10	1
2_4	1a	1	M	5	25	0
2_4	1a	1	M	5	50	0
2_4	1a	1	M	5	100	0
2_4	1a	1	M	25	10	1
2_4	1a	1	M	25	25	0
2_4	1a	1	M	25	50	0
2_4	1a	1	M	25	100	0
2_4	1a	1	M	50	10	1
2_4	1a	1	M	50	25	1
2_4	1a	1	M	50	50	1
2_4	1a	1	M	50	100	0
2_4	1a	1	M	100	10	1
2_4	1a	1	M	100	25	0
2_4	1a	1	M	100	50	1
2_4	1a	1	M	100	100	1
2_4	2a	1	M	5	10	0
2_4	2a	1	M	5	25	0
2_4	2a	1	M	5	50	0
2_4	2a	1	M	5	100	0
2_4	2a	1	M	25	10	1
2_4	2a	1	M	25	25	0
2_4	2a	1	M	25	50	0
2_4	2a	1	M	25	100	0
2_4	2a	1	M	50	10	1
2_4	2a	1	M	50	25	1
2_4	2a	1	M	50	50	0
2_4	2a	1	M	50	100	0
2_4	2a	1	M	100	10	1
2_4	2a	1	M	100	25	1
2_4	2a	1	M	100	50	1
2_4	2a	1	M	100	100	0
2_2	2a	1	M	5	10	0
2_2	2a	1	M	5	25	0
2_2	2a	1	M	5	50	0
2_2	2a	1	M	5	100	0
2_2	2a	1	M	25	10	1
2_2	2a	1	M	25	25	1
2_2	2a	1	M	25	50	0
2_2	2a	1	M	25	100	0
2_2	2a	1	M	50	10	0
2_2	2a	1	M	50	25	1
2_2	2a	1	M	50	50	0
2_2	2a	1	M	50	100	0
2_2	2a	1	M	100	10	0
2_2	2a	1	M	100	25	1
2_2	2a	1	M	100	50	1
2_2	2a	1	M	100	100	1
4_4	1a	1	M	5	10	0
4_4	1a	1	M	5	25	0
4_4	1a	1	M	5	50	0
4_4	1a	1	M	5	100	0
4_4	1a	1	M	25	10	1
4_4	1a	1	M	25	25	0
4_4	1a	1	M	25	50	0
4_4	1a	1	M	25	100	0
4_4	1a	1	M	50	10	1
4_4	1a	1	M	50	25	1
4_4	1a	1	M	50	50	1
4_4	1a	1	M	50	100	0
4_4	1a	1	M	100	10	1
4_4	1a	1	M	100	25	1
4_4	1a	1	M	100	50	1
4_4	1a	1	M	100	100	0
4_1	1a	1	M	5	10	0
4_1	1a	1	M	5	25	1
4_1	1a	1	M	5	50	0
4_1	1a	1	M	5	100	0
4_1	1a	1	M	25	10	0
4_1	1a	1	M	25	25	1
4_1	1a	1	M	25	50	1
4_1	1a	1	M	25	100	0
4_1	1a	1	M	50	10	1
4_1	1a	1	M	50	25	1
4_1	1a	1	M	50	50	1
4_1	1a	1	M	50	100	1
4_1	1a	1	M	100	10	1
4_1	1a	1	M	100	25	1
4_1	1a	1	M	100	50	1
4_1	1a	1	M	100	100	1
4_1	2a	1	M	5	10	0
4_1	2a	1	M	5	25	0
4_1	2a	1	M	5	50	0
4_1	2a	1	M	5	100	0
4_1	2a	1	M	25	10	1
4_1	2a	1	M	25	25	0
4_1	2a	1	M	25	50	0
4_1	2a	1	M	25	100	0
4_1	2a	1	M	50	10	1
4_1	2a	1	M	50	25	1
4_1	2a	1	M	50	50	0
4_1	2a	1	M	50	100	0
4_1	2a	1	M	100	10	1
4_1	2a	1	M	100	25	1
4_1	2a	1	M	100	50	0
4_1	2a	1	M	100	100	0
4_3	1b	1	M	5	10	1
4_3	1b	1	M	5	25	0
4_3	1b	1	M	5	50	0
4_3	1b	1	M	5	100	0
4_3	1b	1	M	25	10	1
4_3	1b	1	M	25	25	0
4_3	1b	1	M	25	50	0
4_3	1b	1	M	25	100	0
4_3	1b	1	M	50	10	1
4_3	1b	1	M	50	25	1
4_3	1b	1	M	50	50	0
4_3	1b	1	M	50	100	0
4_3	1b	1	M	100	10	1
4_3	1b	1	M	100	25	1
4_3	1b	1	M	100	50	1
4_3	1b	1	M	100	100	1
D1	2a	1	M	5	10	0
D1	2a	1	M	5	25	0
D1	2a	1	M	5	50	0
D1	2a	1	M	5	100	0
D1	2a	1	M	25	10	0
D1	2a	1	M	25	25	0
D1	2a	1	M	25	50	0
D1	2a	1	M	25	100	0
D1	2a	1	M	50	10	0
D1	2a	1	M	50	25	0
D1	2a	1	M	50	50	0
D1	2a	1	M	50	100	0
D1	2a	1	M	100	10	1
D1	2a	1	M	100	25	0
D1	2a	1	M	100	50	0
D1	2a	1	M	100	100	0
D1	2b	1	M	5	10	0
D1	2b	1	M	5	25	0
D1	2b	1	M	5	50	0
D1	2b	1	M	5	100	0
D1	2b	1	M	25	10	1
D1	2b	1	M	25	25	1
D1	2b	1	M	25	50	1
D1	2b	1	M	25	100	1
D1	2b	1	M	50	10	1
D1	2b	1	M	50	25	1
D1	2b	1	M	50	50	1
D1	2b	1	M	50	100	1
D1	2b	1	M	100	10	1
D1	2b	1	M	100	25	1
D1	2b	1	M	100	50	1
D1	2b	1	M	100	100	1
D1	2c	1	M	5	10	1
D1	2c	1	M	5	25	0
D1	2c	1	M	5	50	0
D1	2c	1	M	5	100	0
D1	2c	1	M	25	10	1
D1	2c	1	M	25	25	1
D1	2c	1	M	25	50	1
D1	2c	1	M	25	100	1
D1	2c	1	M	50	10	1
D1	2c	1	M	50	25	1
D1	2c	1	M	50	50	1
D1	2c	1	M	50	100	1
D1	2c	1	M	100	10	1
D1	2c	1	M	100	25	1
D1	2c	1	M	100	50	1
D1	2c	1	M	100	100	1
D4	1a	1	M	5	10	0
D4	1a	1	M	5	25	0
D4	1a	1	M	5	50	0
D4	1a	1	M	5	100	0
D4	1a	1	M	25	10	1
D4	1a	1	M	25	25	0
D4	1a	1	M	25	50	0
D4	1a	1	M	25	100	0
D4	1a	1	M	50	10	1
D4	1a	1	M	50	25	1
D4	1a	1	M	50	50	0
D4	1a	1	M	50	100	0
D4	1a	1	M	100	10	1
D4	1a	1	M	100	25	1
D4	1a	1	M	100	50	1
D4	1a	1	M	100	100	0
DF5	1a	1	M	5	10	0
DF5	1a	1	M	5	25	0
DF5	1a	1	M	5	50	0
DF5	1a	1	M	5	100	0
DF5	1a	1	M	25	10	0
DF5	1a	1	M	25	25	0
DF5	1a	1	M	25	50	0
DF5	1a	1	M	25	100	0
DF5	1a	1	M	50	10	1
DF5	1a	1	M	50	25	0
DF5	1a	1	M	50	50	0
DF5	1a	1	M	50	100	0
DF5	1a	1	M	100	10	1
DF5	1a	1	M	100	25	0
DF5	1a	1	M	100	50	0
DF5	1a	1	M	100	100	0
DF5	2a	1	M	5	10	0
DF5	2a	1	M	5	25	0
DF5	2a	1	M	5	50	0
DF5	2a	1	M	5	100	0
DF5	2a	1	M	25	10	1
DF5	2a	1	M	25	25	0
DF5	2a	1	M	25	50	0
DF5	2a	1	M	25	100	0
DF5	2a	1	M	50	10	1
DF5	2a	1	M	50	25	1
DF5	2a	1	M	50	50	0
DF5	2a	1	M	50	100	0
DF5	2a	1	M	100	10	1
DF5	2a	1	M	100	25	1
DF5	2a	1	M	100	50	1
DF5	2a	1	M	100	100	0
DF1	1b	1	M	5	10	0
DF1	1b	1	M	5	25	0
DF1	1b	1	M	5	50	0
DF1	1b	1	M	5	100	0
DF1	1b	1	M	25	10	0
DF1	1b	1	M	25	25	0
DF1	1b	1	M	25	50	0
DF1	1b	1	M	25	100	0
DF1	1b	1	M	50	10	1
DF1	1b	1	M	50	25	1
DF1	1b	1	M	50	50	1
DF1	1b	1	M	50	100	1
DF1	1b	1	M	100	10	1
DF1	1b	1	M	100	25	1
DF1	1b	1	M	100	50	1
DF1	1b	1	M	100	100	1
DF1	1c	1	M	5	10	0
DF1	1c	1	M	5	25	0
DF1	1c	1	M	5	50	0
DF1	1c	1	M	5	100	0
DF1	1c	1	M	25	10	1
DF1	1c	1	M	25	25	0
DF1	1c	1	M	25	50	0
DF1	1c	1	M	25	100	0
DF1	1c	1	M	50	10	1
DF1	1c	1	M	50	25	1
DF1	1c	1	M	50	50	0
DF1	1c	1	M	50	100	0
DF1	1c	1	M	100	10	1
DF1	1c	1	M	100	25	1
DF1	1c	1	M	100	50	1
DF1	1c	1	M	100	100	1
DF1	2a	1	M	5	10	0
DF1	2a	1	M	5	25	0
DF1	2a	1	M	5	50	0
DF1	2a	1	M	5	100	0
DF1	2a	1	M	25	10	0
DF1	2a	1	M	25	25	0
DF1	2a	1	M	25	50	0
DF1	2a	1	M	25	100	0
DF1	2a	1	M	50	10	0
DF1	2a	1	M	50	25	0
DF1	2a	1	M	50	50	0
DF1	2a	1	M	50	100	0
DF1	2a	1	M	100	10	1
DF1	2a	1	M	100	25	0
DF1	2a	1	M	100	50	0
DF1	2a	1	M	100	100	0
DF1	2b	1	M	5	10	0
DF1	2b	1	M	5	25	0
DF1	2b	1	M	5	50	0
DF1	2b	1	M	5	100	0
DF1	2b	1	M	25	10	1
DF1	2b	1	M	25	25	0
DF1	2b	1	M	25	50	0
DF1	2b	1	M	25	100	0
DF1	2b	1	M	50	10	1
DF1	2b	1	M	50	25	1
DF1	2b	1	M	50	50	0
DF1	2b	1	M	50	100	0
DF1	2b	1	M	100	10	1
DF1	2b	1	M	100	25	1
DF1	2b	1	M	100	50	1
DF1	2b	1	M	100	100	1
DF3	2d	1	M	5	10	0
DF3	2d	1	M	5	25	0
DF3	2d	1	M	5	50	0
DF3	2d	1	M	5	100	0
DF3	2d	1	M	25	10	0
DF3	2d	1	M	25	25	0
DF3	2d	1	M	25	50	0
DF3	2d	1	M	25	100	0
DF3	2d	1	M	50	10	0
DF3	2d	1	M	50	25	0
DF3	2d	1	M	50	50	0
DF3	2d	1	M	50	100	0
DF3	2d	1	M	100	10	1
DF3	2d	1	M	100	25	0
DF3	2d	1	M	100	50	0
DF3	2d	1	M	100	100	0
DF2	1c	1	M	5	10	0
DF2	1c	1	M	5	25	0
DF2	1c	1	M	5	50	0
DF2	1c	1	M	5	100	0
DF2	1c	1	M	25	10	0
DF2	1c	1	M	25	25	0
DF2	1c	1	M	25	50	0
DF2	1c	1	M	25	100	0
DF2	1c	1	M	50	10	1
DF2	1c	1	M	50	25	0
DF2	1c	1	M	50	50	0
DF2	1c	1	M	50	100	0
DF2	1c	1	M	100	10	1
DF2	1c	1	M	100	25	1
DF2	1c	1	M	100	50	0
DF2	1c	1	M	100	100	0
DF2	2b	1	M	5	10	0
DF2	2b	1	M	5	25	0
DF2	2b	1	M	5	50	0
DF2	2b	1	M	5	100	0
DF2	2b	1	M	25	10	0
DF2	2b	1	M	25	25	0
DF2	2b	1	M	25	50	0
DF2	2b	1	M	25	100	0
DF2	2b	1	M	50	10	0
DF2	2b	1	M	50	25	0
DF2	2b	1	M	50	50	0
DF2	2b	1	M	50	100	0
DF2	2b	1	M	100	10	1
DF2	2b	1	M	100	25	0
DF2	2b	1	M	100	50	0
DF2	2b	1	M	100	100	0
DF2	2c	1	M	5	10	0
DF2	2c	1	M	5	25	0
DF2	2c	1	M	5	50	0
DF2	2c	1	M	5	100	0
DF2	2c	1	M	25	10	1
DF2	2c	1	M	25	25	0
DF2	2c	1	M	25	50	0
DF2	2c	1	M	25	100	0
DF2	2c	1	M	50	10	1
DF2	2c	1	M	50	25	0
DF2	2c	1	M	50	50	0
DF2	2c	1	M	50	100	0
DF2	2c	1	M	100	10	1
DF2	2c	1	M	100	25	0
DF2	2c	1	M	100	50	0
DF2	2c	1	M	100	100	0
AA2	2a	0	F	5	10	0
AA2	2a	0	F	5	25	0
AA2	2a	0	F	5	50	0
AA2	2a	0	F	5	100	0
AA2	2a	0	F	25	10	1
AA2	2a	0	F	25	25	0
AA2	2a	0	F	25	50	0
AA2	2a	0	F	25	100	0
AA2	2a	0	F	50	10	1
AA2	2a	0	F	50	25	0
AA2	2a	0	F	50	50	0
AA2	2a	0	F	50	100	0
AA2	2a	0	F	100	10	1
AA2	2a	0	F	100	25	0
AA2	2a	0	F	100	50	0
AA2	2a	0	F	100	100	0
AA5	1b	0	F	5	10	0
AA5	1b	0	F	5	25	0
AA5	1b	0	F	5	50	0
AA5	1b	0	F	5	100	0
AA5	1b	0	F	25	10	1
AA5	1b	0	F	25	25	0
AA5	1b	0	F	25	50	0
AA5	1b	0	F	25	100	0
AA5	1b	0	F	50	10	1
AA5	1b	0	F	50	25	0
AA5	1b	0	F	50	50	0
AA5	1b	0	F	50	100	0
AA5	1b	0	F	100	10	1
AA5	1b	0	F	100	25	0
AA5	1b	0	F	100	50	0
AA5	1b	0	F	100	100	0
AA5	1c	0	F	5	10	0
AA5	1c	0	F	5	25	0
AA5	1c	0	F	5	50	0
AA5	1c	0	F	5	100	0
AA5	1c	0	F	25	10	0
AA5	1c	0	F	25	25	0
AA5	1c	0	F	25	50	0
AA5	1c	0	F	25	100	0
AA5	1c	0	F	50	10	0
AA5	1c	0	F	50	25	0
AA5	1c	0	F	50	50	0
AA5	1c	0	F	50	100	0
AA5	1c	0	F	100	10	1
AA5	1c	0	F	100	25	0
AA5	1c	0	F	100	50	0
AA5	1c	0	F	100	100	0
AA5	1e	0	F	5	10	0
AA5	1e	0	F	5	25	0
AA5	1e	0	F	5	50	0
AA5	1e	0	F	5	100	0
AA5	1e	0	F	25	10	0
AA5	1e	0	F	25	25	0
AA5	1e	0	F	25	50	0
AA5	1e	0	F	25	100	0
AA5	1e	0	F	50	10	0
AA5	1e	0	F	50	25	0
AA5	1e	0	F	50	50	0
AA5	1e	0	F	50	100	0
AA5	1e	0	F	100	10	1
AA5	1e	0	F	100	25	0
AA5	1e	0	F	100	50	0
AA5	1e	0	F	100	100	0
AA4	2d	0	F	5	10	0
AA4	2d	0	F	5	25	0
AA4	2d	0	F	5	50	0
AA4	2d	0	F	5	100	0
AA4	2d	0	F	25	10	0
AA4	2d	0	F	25	25	0
AA4	2d	0	F	25	50	0
AA4	2d	0	F	25	100	0
AA4	2d	0	F	50	10	1
AA4	2d	0	F	50	25	0
AA4	2d	0	F	50	50	0
AA4	2d	0	F	50	100	0
AA4	2d	0	F	100	10	1
AA4	2d	0	F	100	25	1
AA4	2d	0	F	100	50	1
AA4	2d	0	F	100	100	1
AA4	2a	0	F	5	10	0
AA4	2a	0	F	5	25	0
AA4	2a	0	F	5	50	0
AA4	2a	0	F	5	100	0
AA4	2a	0	F	25	10	0
AA4	2a	0	F	25	25	0
AA4	2a	0	F	25	50	0
AA4	2a	0	F	25	100	0
AA4	2a	0	F	50	10	1
AA4	2a	0	F	50	25	0
AA4	2a	0	F	50	50	0
AA4	2a	0	F	50	100	0
AA4	2a	0	F	100	10	1
AA4	2a	0	F	100	25	1
AA4	2a	0	F	100	50	0
AA4	2a	0	F	100	100	0
AA1	2b	0	F	5	10	0
AA1	2b	0	F	5	25	0
AA1	2b	0	F	5	50	0
AA1	2b	0	F	5	100	0
AA1	2b	0	F	25	10	0
AA1	2b	0	F	25	25	1
AA1	2b	0	F	25	50	0
AA1	2b	0	F	25	100	0
AA1	2b	0	F	50	10	1
AA1	2b	0	F	50	25	1
AA1	2b	0	F	50	50	1
AA1	2b	0	F	50	100	1
AA1	2b	0	F	100	10	1
AA1	2b	0	F	100	25	1
AA1	2b	0	F	100	50	1
AA1	2b	0	F	100	100	1
AA1	2c	0	F	5	10	0
AA1	2c	0	F	5	25	0
AA1	2c	0	F	5	50	0
AA1	2c	0	F	5	100	0
AA1	2c	0	F	25	10	0
AA1	2c	0	F	25	25	0
AA1	2c	0	F	25	50	0
AA1	2c	0	F	25	100	0
AA1	2c	0	F	50	10	1
AA1	2c	0	F	50	25	1
AA1	2c	0	F	50	50	1
AA1	2c	0	F	50	100	1
AA1	2c	0	F	100	10	1
AA1	2c	0	F	100	25	1
AA1	2c	0	F	100	50	1
AA1	2c	0	F	100	100	1
AA1	1c	0	F	5	10	0
AA1	1c	0	F	5	25	0
AA1	1c	0	F	5	50	0
AA1	1c	0	F	5	100	0
AA1	1c	0	F	25	10	1
AA1	1c	0	F	25	25	0
AA1	1c	0	F	25	50	0
AA1	1c	0	F	25	100	0
AA1	1c	0	F	50	10	1
AA1	1c	0	F	50	25	0
AA1	1c	0	F	50	50	0
AA1	1c	0	F	50	100	0
AA1	1c	0	F	100	10	1
AA1	1c	0	F	100	25	0
AA1	1c	0	F	100	50	0
AA1	1c	0	F	100	100	0
A5	1a	0	F	5	10	0
A5	1a	0	F	5	25	0
A5	1a	0	F	5	50	0
A5	1a	0	F	5	100	0
A5	1a	0	F	25	10	1
A5	1a	0	F	25	25	0
A5	1a	0	F	25	50	0
A5	1a	0	F	25	100	0
A5	1a	0	F	50	10	1
A5	1a	0	F	50	25	1
A5	1a	0	F	50	50	1
A5	1a	0	F	50	100	1
A5	1a	0	F	100	10	1
A5	1a	0	F	100	25	1
A5	1a	0	F	100	50	1
A5	1a	0	F	100	100	1
A5	2a	0	F	5	10	0
A5	2a	0	F	5	25	0
A5	2a	0	F	5	50	0
A5	2a	0	F	5	100	0
A5	2a	0	F	25	10	1
A5	2a	0	F	25	25	1
A5	2a	0	F	25	50	0
A5	2a	0	F	25	100	0
A5	2a	0	F	50	10	0
A5	2a	0	F	50	25	1
A5	2a	0	F	50	50	1
A5	2a	0	F	50	100	1
A5	2a	0	F	100	10	1
A5	2a	0	F	100	25	1
A5	2a	0	F	100	50	1
A5	2a	0	F	100	100	1
A5	2b	0	F	5	10	0
A5	2b	0	F	5	25	0
A5	2b	0	F	5	50	0
A5	2b	0	F	5	100	0
A5	2b	0	F	25	10	1
A5	2b	0	F	25	25	1
A5	2b	0	F	25	50	1
A5	2b	0	F	25	100	1
A5	2b	0	F	50	10	1
A5	2b	0	F	50	25	1
A5	2b	0	F	50	50	1
A5	2b	0	F	50	100	1
A5	2b	0	F	100	10	1
A5	2b	0	F	100	25	1
A5	2b	0	F	100	50	1
A5	2b	0	F	100	100	1
AAA3	1d	0	F	5	10	1
AAA3	1d	0	F	5	25	0
AAA3	1d	0	F	5	50	0
AAA3	1d	0	F	5	100	0
AAA3	1d	0	F	25	10	0
AAA3	1d	0	F	25	25	1
AAA3	1d	0	F	25	50	0
AAA3	1d	0	F	25	100	0
AAA3	1d	0	F	50	10	1
AAA3	1d	0	F	50	25	1
AAA3	1d	0	F	50	50	1
AAA3	1d	0	F	50	100	1
AAA3	1d	0	F	100	10	0
AAA3	1d	0	F	100	25	1
AAA3	1d	0	F	100	50	1
AAA3	1d	0	F	100	100	1
AAA3	2a	0	F	5	10	0
AAA3	2a	0	F	5	25	0
AAA3	2a	0	F	5	50	0
AAA3	2a	0	F	5	100	0
AAA3	2a	0	F	25	10	1
AAA3	2a	0	F	25	25	0
AAA3	2a	0	F	25	50	0
AAA3	2a	0	F	25	100	0
AAA3	2a	0	F	50	10	1
AAA3	2a	0	F	50	25	0
AAA3	2a	0	F	50	50	0
AAA3	2a	0	F	50	100	0
AAA3	2a	0	F	100	10	1
AAA3	2a	0	F	100	25	0
AAA3	2a	0	F	100	50	0
AAA3	2a	0	F	100	100	0
AAA4	1b	0	F	5	10	0
AAA4	1b	0	F	5	25	0
AAA4	1b	0	F	5	50	0
AAA4	1b	0	F	5	100	0
AAA4	1b	0	F	25	10	0
AAA4	1b	0	F	25	25	0
AAA4	1b	0	F	25	50	0
AAA4	1b	0	F	25	100	0
AAA4	1b	0	F	50	10	0
AAA4	1b	0	F	50	25	0
AAA4	1b	0	F	50	50	0
AAA4	1b	0	F	50	100	0
AAA4	1b	0	F	100	10	0
AAA4	1b	0	F	100	25	1
AAA4	1b	0	F	100	50	1
AAA4	1b	0	F	100	100	1
AAA1	1b	0	F	5	10	0
AAA1	1b	0	F	5	25	0
AAA1	1b	0	F	5	50	0
AAA1	1b	0	F	5	100	0
AAA1	1b	0	F	25	10	0
AAA1	1b	0	F	25	25	0
AAA1	1b	0	F	25	50	0
AAA1	1b	0	F	25	100	0
AAA1	1b	0	F	50	10	0
AAA1	1b	0	F	50	25	0
AAA1	1b	0	F	50	50	0
AAA1	1b	0	F	50	100	0
AAA1	1b	0	F	100	10	1
AAA1	1b	0	F	100	25	0
AAA1	1b	0	F	100	50	0
AAA1	1b	0	F	100	100	0
A4	1c	0	F	5	10	0
A4	1c	0	F	5	25	0
A4	1c	0	F	5	50	0
A4	1c	0	F	5	100	0
A4	1c	0	F	25	10	1
A4	1c	0	F	25	25	1
A4	1c	0	F	25	50	1
A4	1c	0	F	25	100	1
A4	1c	0	F	50	10	1
A4	1c	0	F	50	25	1
A4	1c	0	F	50	50	1
A4	1c	0	F	50	100	1
A4	1c	0	F	100	10	1
A4	1c	0	F	100	25	1
A4	1c	0	F	100	50	1
A4	1c	0	F	100	100	1
A4	1d	0	F	5	10	1
A4	1d	0	F	5	25	0
A4	1d	0	F	5	50	0
A4	1d	0	F	5	100	0
A4	1d	0	F	25	10	1
A4	1d	0	F	25	25	0
A4	1d	0	F	25	50	0
A4	1d	0	F	25	100	0
A4	1d	0	F	50	10	1
A4	1d	0	F	50	25	1
A4	1d	0	F	50	50	0
A4	1d	0	F	50	100	0
A4	1d	0	F	100	10	1
A4	1d	0	F	100	25	1
A4	1d	0	F	100	50	1
A4	1d	0	F	100	100	1
A3	1b	0	F	5	10	0
A3	1b	0	F	5	25	0
A3	1b	0	F	5	50	0
A3	1b	0	F	5	100	0
A3	1b	0	F	25	10	1
A3	1b	0	F	25	25	1
A3	1b	0	F	25	50	0
A3	1b	0	F	25	100	0
A3	1b	0	F	50	10	1
A3	1b	0	F	50	25	0
A3	1b	0	F	50	50	0
A3	1b	0	F	50	100	0
A3	1b	0	F	100	10	1
A3	1b	0	F	100	25	1
A3	1b	0	F	100	50	0
A3	1b	0	F	100	100	0
AAA5	1a	0	F	5	10	0
AAA5	1a	0	F	5	25	0
AAA5	1a	0	F	5	50	0
AAA5	1a	0	F	5	100	0
AAA5	1a	0	F	25	10	0
AAA5	1a	0	F	25	25	0
AAA5	1a	0	F	25	50	0
AAA5	1a	0	F	25	100	0
AAA5	1a	0	F	50	10	1
AAA5	1a	0	F	50	25	0
AAA5	1a	0	F	50	50	0
AAA5	1a	0	F	50	100	0
AAA5	1a	0	F	100	10	1
AAA5	1a	0	F	100	25	0
AAA5	1a	0	F	100	50	0
AAA5	1a	0	F	100	100	0
BBB1	1b	1	F	5	10	0
BBB1	1b	1	F	5	25	0
BBB1	1b	1	F	5	50	0
BBB1	1b	1	F	5	100	0
BBB1	1b	1	F	25	10	1
BBB1	1b	1	F	25	25	0
BBB1	1b	1	F	25	50	0
BBB1	1b	1	F	25	100	0
BBB1	1b	1	F	50	10	1
BBB1	1b	1	F	50	25	0
BBB1	1b	1	F	50	50	0
BBB1	1b	1	F	50	100	0
BBB1	1b	1	F	100	10	1
BBB1	1b	1	F	100	25	1
BBB1	1b	1	F	100	50	0
BBB1	1b	1	F	100	100	0
BBB1	1c	1	F	5	10	0
BBB1	1c	1	F	5	25	0
BBB1	1c	1	F	5	50	0
BBB1	1c	1	F	5	100	0
BBB1	1c	1	F	25	10	0
BBB1	1c	1	F	25	25	0
BBB1	1c	1	F	25	50	0
BBB1	1c	1	F	25	100	1
BBB1	1c	1	F	50	10	0
BBB1	1c	1	F	50	25	0
BBB1	1c	1	F	50	50	0
BBB1	1c	1	F	50	100	0
BBB1	1c	1	F	100	10	1
BBB1	1c	1	F	100	25	0
BBB1	1c	1	F	100	50	0
BBB1	1c	1	F	100	100	0
BBB3	1a	1	F	5	10	0
BBB3	1a	1	F	5	25	0
BBB3	1a	1	F	5	50	0
BBB3	1a	1	F	5	100	0
BBB3	1a	1	F	25	10	1
BBB3	1a	1	F	25	25	0
BBB3	1a	1	F	25	50	0
BBB3	1a	1	F	25	100	0
BBB3	1a	1	F	50	10	1
BBB3	1a	1	F	50	25	1
BBB3	1a	1	F	50	50	0
BBB3	1a	1	F	50	100	0
BBB3	1a	1	F	100	10	1
BBB3	1a	1	F	100	25	1
BBB3	1a	1	F	100	50	1
BBB3	1a	1	F	100	100	1
BBB3	1c	1	F	5	10	0
BBB3	1c	1	F	5	25	0
BBB3	1c	1	F	5	50	0
BBB3	1c	1	F	5	100	0
BBB3	1c	1	F	25	10	1
BBB3	1c	1	F	25	25	0
BBB3	1c	1	F	25	50	0
BBB3	1c	1	F	25	100	0
BBB3	1c	1	F	50	10	1
BBB3	1c	1	F	50	25	1
BBB3	1c	1	F	50	50	1
BBB3	1c	1	F	50	100	1
BBB3	1c	1	F	100	10	1
BBB3	1c	1	F	100	25	1
BBB3	1c	1	F	100	50	1
BBB3	1c	1	F	100	100	1
BB5	1a	1	F	5	10	0
BB5	1a	1	F	5	25	0
BB5	1a	1	F	5	50	0
BB5	1a	1	F	5	100	0
BB5	1a	1	F	25	10	0
BB5	1a	1	F	25	25	0
BB5	1a	1	F	25	50	0
BB5	1a	1	F	25	100	0
BB5	1a	1	F	50	10	0
BB5	1a	1	F	50	25	0
BB5	1a	1	F	50	50	0
BB5	1a	1	F	50	100	0
BB5	1a	1	F	100	10	1
BB5	1a	1	F	100	25	0
BB5	1a	1	F	100	50	0
BB5	1a	1	F	100	100	0
BB5	1b	1	F	5	10	0
BB5	1b	1	F	5	25	0
BB5	1b	1	F	5	50	0
BB5	1b	1	F	5	100	0
BB5	1b	1	F	25	10	0
BB5	1b	1	F	25	25	0
BB5	1b	1	F	25	50	0
BB5	1b	1	F	25	100	0
BB5	1b	1	F	50	10	0
BB5	1b	1	F	50	25	0
BB5	1b	1	F	50	50	0
BB5	1b	1	F	50	100	0
BB5	1b	1	F	100	10	1
BB5	1b	1	F	100	25	0
BB5	1b	1	F	100	50	0
BB5	1b	1	F	100	100	0
BB5	2c	1	F	5	10	0
BB5	2c	1	F	5	25	0
BB5	2c	1	F	5	50	0
BB5	2c	1	F	5	100	0
BB5	2c	1	F	25	10	0
BB5	2c	1	F	25	25	0
BB5	2c	1	F	25	50	0
BB5	2c	1	F	25	100	0
BB5	2c	1	F	50	10	1
BB5	2c	1	F	50	25	1
BB5	2c	1	F	50	50	1
BB5	2c	1	F	50	100	1
BB5	2c	1	F	100	10	1
BB5	2c	1	F	100	25	1
BB5	2c	1	F	100	50	1
BB5	2c	1	F	100	100	1
BB5	2b	1	F	5	10	0
BB5	2b	1	F	5	25	0
BB5	2b	1	F	5	50	0
BB5	2b	1	F	5	100	0
BB5	2b	1	F	25	10	1
BB5	2b	1	F	25	25	0
BB5	2b	1	F	25	50	0
BB5	2b	1	F	25	100	0
BB5	2b	1	F	50	10	1
BB5	2b	1	F	50	25	1
BB5	2b	1	F	50	50	1
BB5	2b	1	F	50	100	0
BB5	2b	1	F	100	10	1
BB5	2b	1	F	100	25	1
BB5	2b	1	F	100	50	1
BB5	2b	1	F	100	100	1
BB4	2b	1	F	5	10	0
BB4	2b	1	F	5	25	0
BB4	2b	1	F	5	50	0
BB4	2b	1	F	5	100	0
BB4	2b	1	F	25	10	0
BB4	2b	1	F	25	25	0
BB4	2b	1	F	25	50	0
BB4	2b	1	F	25	100	0
BB4	2b	1	F	50	10	0
BB4	2b	1	F	50	25	0
BB4	2b	1	F	50	50	0
BB4	2b	1	F	50	100	0
BB4	2b	1	F	100	10	0
BB4	2b	1	F	100	25	0
BB4	2b	1	F	100	50	0
BB4	2b	1	F	100	100	0
BB4	2c	1	F	5	10	0
BB4	2c	1	F	5	25	0
BB4	2c	1	F	5	50	0
BB4	2c	1	F	5	100	0
BB4	2c	1	F	25	10	1
BB4	2c	1	F	25	25	1
BB4	2c	1	F	25	50	1
BB4	2c	1	F	25	100	0
BB4	2c	1	F	50	10	1
BB4	2c	1	F	50	25	1
BB4	2c	1	F	50	50	1
BB4	2c	1	F	50	100	1
BB4	2c	1	F	100	10	1
BB4	2c	1	F	100	25	1
BB4	2c	1	F	100	50	0
BB4	2c	1	F	100	100	1
BB4	2a	1	F	5	10	0
BB4	2a	1	F	5	25	0
BB4	2a	1	F	5	50	0
BB4	2a	1	F	5	100	0
BB4	2a	1	F	25	10	0
BB4	2a	1	F	25	25	0
BB4	2a	1	F	25	50	0
BB4	2a	1	F	25	100	0
BB4	2a	1	F	50	10	0
BB4	2a	1	F	50	25	0
BB4	2a	1	F	50	50	0
BB4	2a	1	F	50	100	0
BB4	2a	1	F	100	10	0
BB4	2a	1	F	100	25	0
BB4	2a	1	F	100	50	0
BB4	2a	1	F	100	100	0
BB1	1b	1	F	5	10	0
BB1	1b	1	F	5	25	0
BB1	1b	1	F	5	50	0
BB1	1b	1	F	5	100	0
BB1	1b	1	F	25	10	0
BB1	1b	1	F	25	25	0
BB1	1b	1	F	25	50	0
BB1	1b	1	F	25	100	0
BB1	1b	1	F	50	10	0
BB1	1b	1	F	50	25	0
BB1	1b	1	F	50	50	0
BB1	1b	1	F	50	100	0
BB1	1b	1	F	100	10	1
BB1	1b	1	F	100	25	0
BB1	1b	1	F	100	50	0
BB1	1b	1	F	100	100	0
B3	1c	1	F	5	10	1
B3	1c	1	F	5	25	0
B3	1c	1	F	5	50	0
B3	1c	1	F	5	100	0
B3	1c	1	F	25	10	1
B3	1c	1	F	25	25	1
B3	1c	1	F	25	50	0
B3	1c	1	F	25	100	0
B3	1c	1	F	50	10	1
B3	1c	1	F	50	25	1
B3	1c	1	F	50	50	1
B3	1c	1	F	50	100	1
B3	1c	1	F	100	10	1
B3	1c	1	F	100	25	1
B3	1c	1	F	100	50	1
B3	1c	1	F	100	100	1
B4	2a	1	F	5	10	0
B4	2a	1	F	5	25	0
B4	2a	1	F	5	50	0
B4	2a	1	F	5	100	0
B4	2a	1	F	25	10	0
B4	2a	1	F	25	25	0
B4	2a	1	F	25	50	0
B4	2a	1	F	25	100	0
B4	2a	1	F	50	10	0
B4	2a	1	F	50	25	0
B4	2a	1	F	50	50	0
B4	2a	1	F	50	100	0
B4	2a	1	F	100	10	0
B4	2a	1	F	100	25	0
B4	2a	1	F	100	50	0
B4	2a	1	F	100	100	0
B4	1b	1	F	5	10	0
B4	1b	1	F	5	25	0
B4	1b	1	F	5	50	0
B4	1b	1	F	5	100	0
B4	1b	1	F	25	10	0
B4	1b	1	F	25	25	0
B4	1b	1	F	25	50	0
B4	1b	1	F	25	100	0
B4	1b	1	F	50	10	1
B4	1b	1	F	50	25	0
B4	1b	1	F	50	50	0
B4	1b	1	F	50	100	0
B4	1b	1	F	100	10	1
B4	1b	1	F	100	25	1
B4	1b	1	F	100	50	1
B4	1b	1	F	100	100	0
B2	2b	1	F	5	10	0
B2	2b	1	F	5	25	0
B2	2b	1	F	5	50	0
B2	2b	1	F	5	100	0
B2	2b	1	F	25	10	0
B2	2b	1	F	25	25	0
B2	2b	1	F	25	50	0
B2	2b	1	F	25	100	0
B2	2b	1	F	50	10	0
B2	2b	1	F	50	25	0
B2	2b	1	F	50	50	0
B2	2b	1	F	50	100	0
B2	2b	1	F	100	10	1
B2	2b	1	F	100	25	1
B2	2b	1	F	100	50	0
B2	2b	1	F	100	100	0
B2	1b	1	F	5	10	0
B2	1b	1	F	5	25	0
B2	1b	1	F	5	50	0
B2	1b	1	F	5	100	0
B2	1b	1	F	25	10	1
B2	1b	1	F	25	25	1
B2	1b	1	F	25	50	0
B2	1b	1	F	25	100	0
B2	1b	1	F	50	10	1
B2	1b	1	F	50	25	1
B2	1b	1	F	50	50	1
B2	1b	1	F	50	100	0
B2	1b	1	F	100	10	1
B2	1b	1	F	100	25	1
B2	1b	1	F	100	50	1
B2	1b	1	F	100	100	1
B2	1c	1	F	5	10	0
B2	1c	1	F	5	25	0
B2	1c	1	F	5	50	0
B2	1c	1	F	5	100	0
B2	1c	1	F	25	10	1
B2	1c	1	F	25	25	0
B2	1c	1	F	25	50	0
B2	1c	1	F	25	100	0
B2	1c	1	F	50	10	1
B2	1c	1	F	50	25	1
B2	1c	1	F	50	50	1
B2	1c	1	F	50	100	0
B2	1c	1	F	100	10	1
B2	1c	1	F	100	25	1
B2	1c	1	F	100	50	1
B2	1c	1	F	100	100	1
B2	1e	1	F	5	10	0
B2	1e	1	F	5	25	0
B2	1e	1	F	5	50	0
B2	1e	1	F	5	100	0
B2	1e	1	F	25	10	1
B2	1e	1	F	25	25	0
B2	1e	1	F	25	50	0
B2	1e	1	F	25	100	0
B2	1e	1	F	50	10	1
B2	1e	1	F	50	25	1
B2	1e	1	F	50	50	0
B2	1e	1	F	50	100	0
B2	1e	1	F	100	10	1
B2	1e	1	F	100	25	1
B2	1e	1	F	100	50	0
B2	1e	1	F	100	100	0
BBB1	1a	1	F	5	10	0
BBB1	1a	1	F	5	25	0
BBB1	1a	1	F	5	50	0
BBB1	1a	1	F	5	100	0
BBB1	1a	1	F	25	10	1
BBB1	1a	1	F	25	25	1
BBB1	1a	1	F	25	50	0
BBB1	1a	1	F	25	100	0
BBB1	1a	1	F	50	10	1
BBB1	1a	1	F	50	25	1
BBB1	1a	1	F	50	50	1
BBB1	1a	1	F	50	100	0
BBB1	1a	1	F	100	10	1
BBB1	1a	1	F	100	25	1
BBB1	1a	1	F	100	50	1
BBB1	1a	1	F	100	100	1

## Sheet: Mechanical Properties
Animal #	Age (Days)	Muscle mass (g)	LO (mm)	CSA (mm2)	CSA (cm2)	Max Tetanic (N/cm2)	Date	Muscle #	Drug	Condition	Stretch length	Stretch speed	BL tension (mN)	Peak tension (mN)	ESE (MPa)	Plateau tension (mN)	EPE (MPa)	sex	Baseline Stress (g/mm2)	Peak Stress (g/mm2)	Plateau Stress (g/mm2)
1_5	110	0.0119	10.8	1.05	1.05e-06	7.40771	2014-06-04	1	Control	0	0.05	40	4.45257	37.303	1.06	22.7118	0.74	M	0.426	3.1431	1.747
3_5	104	0.0135	12.44	1.03	1.03e-06	23.2222	2014-08-04	1	Control	0	0.05	40	8.4757	79.0886	2.23	48.7377	1.52	M	0.8229	6.856	3.9091
3_3	108	0.0121	11.44	1	1e-06	20.6402	2014-08-08	1	Control	0	0.05	40	8.01458	69.8126	2	39.8252	1.25	M	0.7982	6.1547	3.1681
3_3	108	0.0121	13.3	0.86	8.6e-07	37.0972	2014-08-08	2	Control	0	0.05	40	6.81449	63.467	2.15	36.1567	1.35	M	0.7943	6.6031	3.42
3_1	113	0.0086	12.37	0.66	6.6e-07	25.9109	2014-08-13	1	Control	0	0.05	40	7.1466	73.36	3.28	43.4938	2.27	M	1.0893	10.0925	5.5402
3_2_2	115	0.0119	11.1	1.01	1.01e-06	25.0121	2014-08-15	2	Control	0	0.05	40	7.35357	57.7383	1.62	33.9754	1.08	M	0.7274	4.9839	2.6333
2_4	111	0.0131	11.73	1.05	1.05e-06	16.5911	2014-06-05	1	HFD	1	0.05	40	8.53207	59.4987	1.62	37.5276	1.12	M	0.8092	4.834	2.7501
2_2	117	0.01	11.15	0.85	8.5e-07	10.3112	2014-06-11	2	HFD	1	0.05	40	4.95788	42.124	1.59	23.9573	1.06	M	0.5861	4.3937	2.2461
2_3	119	0.0107	11.29	0.9	9e-07	20.8116	2014-06-13	1	HFD	1	0.05	40	3.78314	44.6786	1.48	25.7399	0.96	M	0.4207	4.5482	2.4419
4_4	105	0.0114	12.53	0.86	8.6e-07	21.4575	2014-08-05	1	HFD	1	0.05	40	6.68919	52.197	1.64	33.1381	1.15	M	0.7466	5.0792	3.0807
4_1	107	0.0122	10.23	1.13	1.13e-06	17.9252	2014-08-07	1	HFD	1	0.05	40	6.9453	48.1538	1.19	31.8932	0.89	M	0.6145	3.646	2.2073
4_1	107	0.0127	13.9	0.87	8.7e-07	28.5393	2014-08-07	2	HFD	1	0.05	40	6.481	66.6068	2.24	36.8728	1.37	M	0.7485	6.9437	3.5099
4_3	111	0.0105	12.29	0.81	8.1e-07		2014-08-11	1	HFD	1	0.05	40	6.58288	53.8715	1.9	33.6339	1.3	M	0.8121	5.8339	3.3372
C5	119	0.0105	13.43	0.74	7.4e-07	41.65	2015-06-23	1	Control	0	0.05	40	8.23095	70.2251	3.32	42.9377	2.09	M	1.116	8.4054	4.7125
C5	119	0.0106	9.31	1.08	1.08e-06	13.4435	2015-06-23	2	Control	0	0.05	40	6.04679	39.0352	1.21	23.9783	0.8	M	0.5619	3.0654	1.6672
C11a	124	0.0115	12.61	0.86	8.6e-07	28.2627	2015-06-29	1	Control	0	0.05	40	5.4176	37.8886	1.49	25.2657	1.03	M	0.6268	3.7566	2.2963
C2	126	0.012	11.78	0.96	9.6e-07	13.3666	2015-07-01	1	Control	0	0.05	40	6.67761	39.2162	1.34	26.3721	0.96	M	0.694	3.3815	2.0467
C2	126	0.0133	10.8	1.17	1.17e-06	21.5427	2015-07-01	2	Control	0	0.05	40	2.9632	27.0058	0.82	15.7911	0.57	M	0.2541	2.0617	1.1
C3	127	0.011	12.29	0.85	8.5e-07	29.4013	2015-07-02	1	Control	0	0.05	40	4.745	31.8739	1.27	21.3331	0.91	M	0.5593	3.1979	1.9553
C3	127	0.0102	10.98	0.88	8.8e-07	13.9475	2015-07-02	2	Control	0	0.05	40	4.18453	43.4305	1.77	20.8805	1.04	M	0.4766	4.4701	1.9016
D4	121	0.0087	12.34	0.67	6.7e-07		2015-06-26	1	HFD	1	0.05	40	6.1219	54.957	2.87	31.7029	1.75	M	0.9201	7.3399	3.8448
DF5	125	0.0102	10.79	0.9	9e-07	19.0232	2015-10-23	1	HFD	1	0.05	40	2.37236	24.2338	0.97	13.2682	0.76	M	0.265	2.4421	1.2172
DF5	125	0.0107	11.99	0.84	8.4e-07		2015-10-23	2	HFD	1	0.05	40	4.13338	47.3643	2.04	25.8264	1.44	M	0.4896	5.1204	2.5694
DF1	129	0.0074	11.49	0.61	6.1e-07	17.6688	2015-10-27	1	HFD	1	0.05	40	4.09981	41.4162	2.43	22.9387	1.73	M	0.6713	6.1103	3.0848
DF1	129	0.0074	10.28	0.68	6.8e-07		2015-10-27	2	HFD	1	0.05	40	5.11335	45.7334	2.12	20.7033	1.49	M	0.5415	5.3138	2.4915
DF3	130	0.0103	10.94	0.89	8.9e-07	22.1702	2015-10-28	1	HFD	1	0.05	40	5.46274	38.0968	1.46	23.6198	1.12	M	0.6121	3.6567	2.0346
DF3	130	0.0107	14.7	0.69	6.9e-07	12.75	2015-10-28	2	HFD	1	0.05	40	6.57038	66.6574	3.47	36.274	2.19	M	0.9523	8.7091	4.3053
DF2	132	0.0108	12.24	0.83	8.3e-07	16.5358	2015-10-30	1	HFD	1	0.05	40	2.63828	24.6751	1.06	13.6999	0.85	M	0.3163	2.6423	1.3263
DF2	132	0.0097	11.64	0.79	7.9e-07	25.2872	2015-10-30	2	HFD	1	0.05	40	7.52046	58.5698	2.59	34.4895	1.95	M	0.9579	6.5025	3.4352
A52a	110	0.0093	10.1	0.87	8.7e-07		2015-06-08	2	Control	0	0.05	40	0.418512	10.2592	0.45	5.59226	0.31	F	0.0482	1.1334	0.5959
A41c	112	0.01	12.2	0.78	7.8e-07		2015-06-10	1	Control	0	0.05	40	4.65212	32.2963	1.4	20.6994	0.97	F	0.5981	3.5543	2.0633
A31b	114	0.0079	11.39	0.66	6.6e-07		2015-06-12	1	Control	0	0.05	40	5.86632	47.2123	2.5	31.1296	1.8	F	0.8954	6.311	3.8561
AA22a	111	0.0092	11.82	0.74	7.4e-07	8.81763	2016-03-28	2	Control	0	0.05	40	3.3103	20.7417	1.05	10.9944	0.79	F	0.4481	2.3598	1.0403
AA51b	112	0.0078	10.38	0.71	7.1e-07	13.1566	2016-03-29	1	Control	0	0.05	40	3.18974	15.2637	0.68	7.62703	0.45	F	0.4506	1.7055	0.6268
AAA51a	135	0.0111	11.99	0.87	8.7e-07		2016-04-21	1	Control	0	0.05	40	4.45712	26.8049	1.01	15.9448	0.73	F	0.5102	2.5584	1.3063
AAA31c	120	0.0129	10.1	1.21	1.21e-06	14.7546	2016-04-27	1	Control	0	0.05	40	2.39853	19.2547	0.55	11.8675	0.47	F	0.1986	1.3958	0.7841
AAA31c	120	0.0102	9.22	1.05	1.05e-06	12.2855	2016-04-27	2	Control	0	0.05	40	3.45814	44.7548	1.56	19.9454	1.09	F	0.3301	3.9419	1.5738
AAA41b	121	0.0098	10.51	0.88	8.8e-07	14.961	2016-04-28	1	Control	0	0.05	40	6.22307	62.3786	2.51	28.7429	1.88	F	0.7033	6.3467	2.5452
AA42d	113	0.0082	13.59	0.57	5.7e-07	25.931	2016-03-30	2	Control	0	0.05	40	2.31065	46.0476	1.86	22.9856	1.04	F	0.4064	7.692	3.6361
AA12b	115	0.0079	12.86	0.58	5.8e-07	22.284	2016-04-01	2	Control	0	0.05	40	3.21674	27.079	0.98	16.6882	0.64	F	0.5551	4.1176	2.3246
B31c	113	0.0093	13.61	0.64	6.4e-07		2015-06-11	1	HFD	1	0.05	40	4.52537	35.8066	1.92	23.5559	1.4	F	0.7016	4.8498	2.9505
B31c	113	0.01	11.92	0.79	7.9e-07		2015-06-11	2	HFD	1	0.05	40	2.89492	33.2317	1.25	21.2627	0.84	F	0.3052	3.1422	1.8027
B42a	117	0.0081	9.25	0.83	8.3e-07		2015-06-15	1	HFD	1	0.05	40	6.86122	34.1369	1.31	23.0731	0.92	F	0.8305	3.3015	1.9623
B12c	119	0.0085	9.38	0.86	8.6e-07		2015-06-17	2	HFD	1	0.05	40	5.38999	30.3048	1.15	18.8186	0.75	F	0.6296	2.9102	1.5686
B22b	124	0.008	10.14	0.75	7.5e-07		2015-06-22	1	HFD	1	0.05	40	4.88238	27.1868	1.18	18.1044	0.84	F	0.6535	2.9854	1.7697
BB42b	106	0.0138	10.49	1.25	1.25e-06	8.00769	2016-04-13	2	HFD	1	0.05	40	2.64917	18.9381	0.52	8.18347	0.37	F	0.2122	1.3047	0.4433
BBB31a	128	0.0092	9.86	0.89	8.9e-07	18.689	2016-05-05	1	HFD	1	0.05	40	5.94146	33.3095	1.22	15.6282	0.98	F	0.6702	3.0873	1.0927
BBB22a	134	0.0098	9.5	0.98	9.8e-07	35.7482	2016-05-11	2	HFD	1	0.05	40	5.25434	20.8867	0.66	12.7426	0.56	F	0.5373	1.5986	0.7658
BBB11a	136	0.007	10.14	0.65	6.5e-07	17.4165	2016-05-13	1	HFD	1	0.05	40	3.82078	25.2699	0.9	13.4984	0.69	F	0.4916	2.2629	0.973
BB51a	119	0.0103	8.68	1.12	1.12e-06	10.6811	2016-04-06	2	HFD	1	0.05	40	6.287	35.0175	0.61	24.102	0.45	F	0.5617	2.5667	1.5916
2_4_2	111	0.0137	13.95	0.93	9.3e-07		2014-06-05	2	HFD	1	0.05	40	6.85781	48.0047	1.76	28.9844	1.29	M	0.7396	4.4374	2.3862
B42a	120	0.011	10.63	0.98	9.8e-07		2015-06-25	2	HFD	1	0.05	40	3.86916	23.5458	0.8	16.0224	0.59	F	0.3945	2.0061	1.2391
D42c	120	0.0117	11.05	1	1e-06		2015-06-26	2	HFD	1	0.05	40	2.63473	25.7385	0.91	14.7149	0.58	M	0.2628	2.3042	1.2048
AA12a	115	0.0085	11.79	0.68	6.8e-07	21.535	2016-04-01	1	Control	0	0.05	40	3.94236	20.2524	0.94	11.8291	0.65	F	0.5761	2.3834	1.1525
AAA11b	143	0.0097	10.6	0.86	8.6e-07		2016-04-29	1	Control	0	0.05	40	5.32783	37.809	1.49	17.4031	1.25	F	0.6167	3.7599	1.3978
B21c	124	0.0093	11.71	0.75	7.5e-07		2015-06-22	2	HFD	1	0.05	40	-0.00263431	6.69864	0.36	3.37949	0.24	F	-0.0003	0.8901	0.4492
B41a	117	0.0104	11.59	0.85	8.5e-07		2015-06-15	2	HFD	1	0.05	40	3.07362	29.7013	1.24	17.7323	0.86	F	0.3603	3.1216	1.7185
BB11b	129	0.0089	10.69	0.79	7.9e-07		2016-04-15	1	HFD	1	0.05	40	2.52009	17.8156	0.77	9.21959	0.62	F	0.3204	1.9444	0.8517
BB52a	119	0.0076	10.03	0.72	7.2e-07		2016-04-06	1	HFD	1	0.05	40	3.00748	14.7744	0.65	6.63887	0.56	F	0.418	1.6356	0.5048
BBB51a	135	0.0111	11.99	0.87	8.7e-07		2016-04-21	1	HFD	1	0.05	40	4.45712	26.8049	1.01	15.9448	0.73	F	0.5102	2.5584	1.3151
A52a	110	0.0098	12.37	0.75	7.5e-07		2015-06-08	1	Control	0	0.05	40	2.58594	18.2955	0.83	12.0294	0.62	F	0.3433	2.0855	1.2603
1_4	116	0.0116	12.65	0.87	8.7e-07		2014-06-10	1	Control	0	0.05	40	5.43138	52.8877	1.77	25.7853	1.32	M	0.6244	5.4556	2.3399
D1	120	0.0098	11.51	0.81	8.1e-07		2015-06-24	2	HFD	1	0.05	40	4.38149	37.2348	1.6	22.7512	1.08	M	0.5228	4.0538	2.3105
